# Supplementary material for: Exploration of functional group effects on D2/H2 separation selectivity within the UiO-66 framework
Source: Royal Society of Chemistry journal article supplement (doi:10.1039/d4qi02802c), 2024-12-03
Supplement: d4qi02802c1.pdf [file d4qi02802c1.pdf]

## Exploration of Functional Group Effects on D<sub>2</sub>/H<sub>2</sub> Separation Selectivity within the UiO-66 Framework

Xiufang Li<sup>a</sup>, Yanxi Tan<sup>a,b</sup>, Zhanfeng Ju<sup>b</sup>, Wenjing Wang<sup>a,b,\*</sup>, and Daqiang Yuan<sup>a,b,\*</sup>

<sup>a</sup> University of the Chinese Academy of Sciences, Beijing 100049, China

<sup>b</sup> State Key Laboratory of Structural Chemistry, Fujian Institute of Research on the Structure of Matter, Chinese Academy of Sciences, Fuzhou 350002, China

\*Email: wjwang@fjirsm.ac.cn or ydq@fjirsm.ac.cn

### General procedures

#### Gas adsorption isotherms

Prior to gas adsorption testing, **UiO-66** and its derivatives were soaked in MeOH for solvent exchange for three days to remove the high-boiling solvent. Then, these samples were soaked in CH<sub>2</sub>Cl<sub>2</sub> for another three days. Subsequently, approximately 100-150 mg of sample was activated at 100 °C for 24 h under dynamic vacuum ( $\leq 10$   $\mu$ m Hg). Adsorption and desorption experiments of H<sub>2</sub>, D<sub>2</sub> and N<sub>2</sub> were performed using a Micromeritics ASAP 2020 PLUS instrument equipped with commercial software for data calculation and analysis at different temperatures. The test temperatures were controlled by soaking sample cell into liquid nitrogen bath (77 K) or liquid argon bath (87 K).

The isosteric enthalpy of adsorption is calculated from single-component gas equilibrium adsorption isotherms at different temperatures according to the Virial Method:

$$\ln(P) = \ln(N) + \left(\frac{1}{T}\right) \sum_{i=0}^m a_i \times N^i + \sum_{j=0}^n b_j \times N^j$$

where,  $P$  is the pressure in mmHg,  $N$  is the amount adsorbed in mg/g,  $T$  is the temperature in K,  $a_i$  and  $b_j$  represents virial coefficients, and  $m$  and  $n$  specify the number of coefficients needed for a precise description of the isotherms. The values of the virial coefficients  $a_0$  to  $a_m$  were further used to determine the isosteric enthalpy of adsorption according to the following equation:

$$Q_{st} = -R \times \sum_{i=0}^m a_i \times N^i$$

where  $Q_{st}$  is the coverage-dependent isosteric enthalpy of adsorption in kJ/mol and  $R$  is universal gas constant with the value of  $8.314 \text{ J mol}^{-1} \text{ K}^{-1}$ .

### Breakthrough Measurements

The complete breakthrough of  $D_2$  was determined using downstream gas composition reaching that of feed gas. Based on the mass balance, the gas adsorption capacities can be attained from the following equation:

$$q_i = \frac{C_i V}{22.4} \times \int_0^t \left(1 - \frac{F}{F_0}\right) dt$$

Where  $q_i$  refers to the equilibrium adsorption capacity of gas  $i$  ( $\text{mmol g}^{-1}$ ),  $C_i$  represents the feed gas concentration,  $V$  refers to the volumetric feed flow rate ( $\text{cm}^3 \text{ min}^{-1}$ ),  $t$  represents the adsorption time (min),  $F_0$  and  $F$ , respectively, refer to the inlet and outlet gas molar flow rates, and  $m$  represents adsorbent mass of (g). The separation factor ( $\alpha$ ) of breakthrough experiment can be calculated as follows:

$$\alpha = \frac{q_A y_B}{q_B y_A}$$

In which  $y_i$  is molar fraction of gas  $i$  ( $i = A, B$ ) in gas mixture.

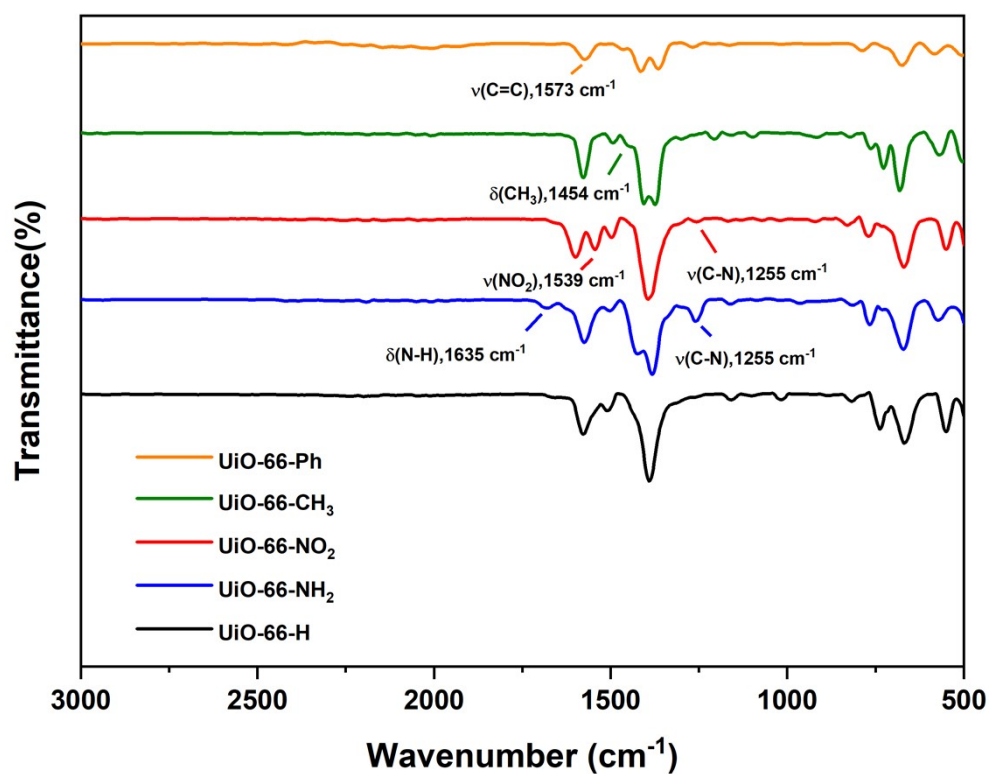

Fig. S1 IR spectra of UiO-66 and its derivatives.

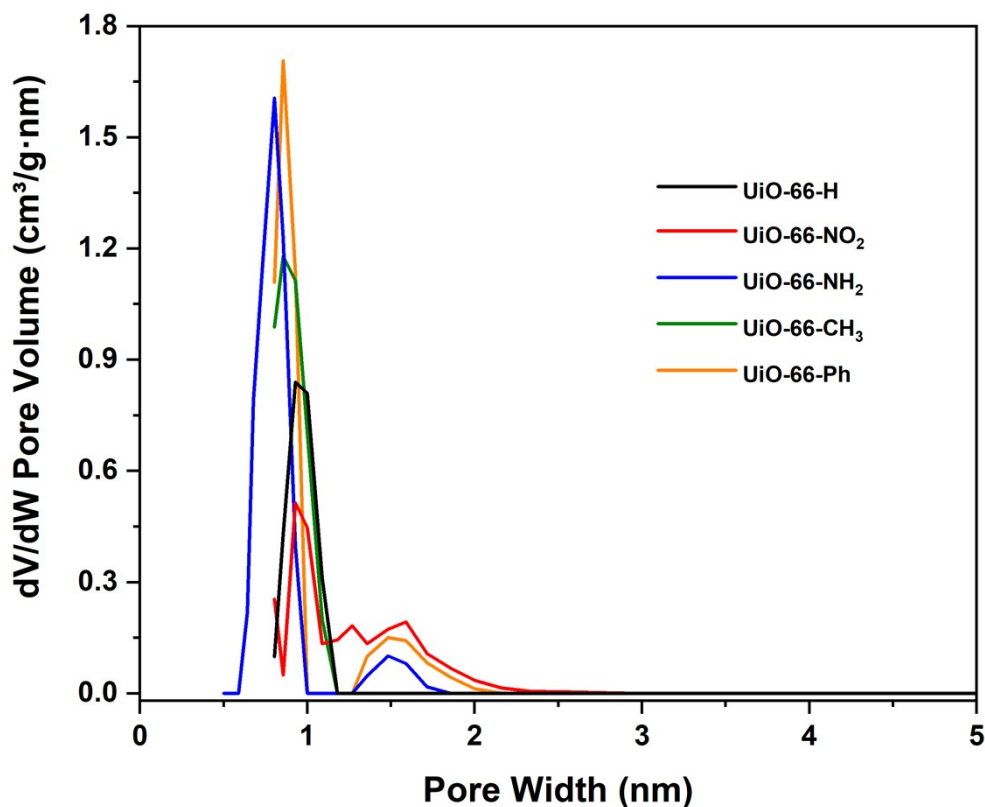

Fig. S2 Pore size distributions for UiO-66 and its derivatives by using DFT method.

**Table S1** Surface area, hydrogen isotopes uptake and micropore volume for **UiO-66** and its derivatives

|                                            | UiO-66 | UiO-66-NH <sub>2</sub> | UiO-66-NO <sub>2</sub> | UiO-66-CH <sub>3</sub> | UiO-66-Ph |
|--------------------------------------------|--------|------------------------|------------------------|------------------------|-----------|
| <b>BET (m<sup>2</sup>/g)</b>               | 1257   | 1017                   | 974                    | 909                    | 890       |
| <b>77 K H<sub>2</sub> (mol/mol)</b>        | 62.8   | 63.0                   | 59.0                   | 60.1                   | 53.5      |
| <b>77 K D<sub>2</sub> (mol/mol)</b>        | 69.2   | 68.4                   | 64.2                   | 67.5                   | 57.9      |
| <b>87 K H<sub>2</sub> (mol/mol)</b>        | 44.8   | 50.3                   | 44.6                   | 48.9                   | 42.2      |
| <b>87 K D<sub>2</sub> (mol/mol)</b>        | 48.6   | 53.9                   | 49.0                   | 51.1                   | 45.6      |
| <b>Micropore volume (cm<sup>3</sup>/g)</b> | 0.483  | 0.388                  | 0.435                  | 0.360                  | 0.325     |

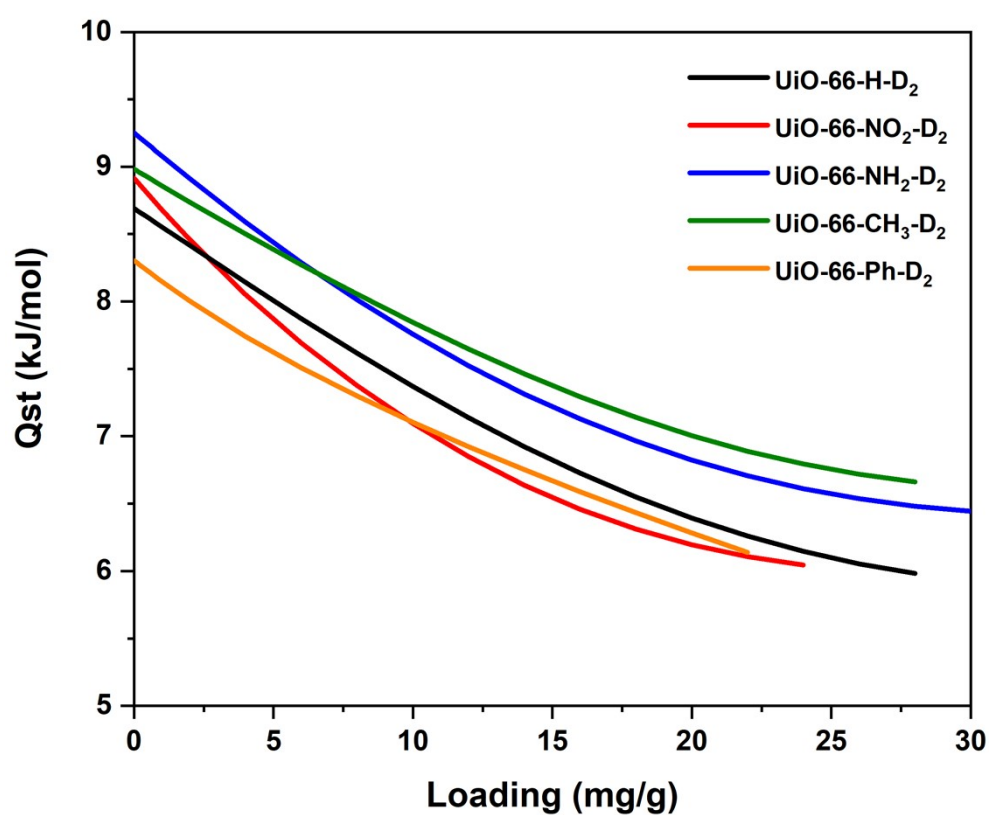

**Fig. S3**  $Q_{st}$  values of D<sub>2</sub> for **UiO-66** and its derivatives.

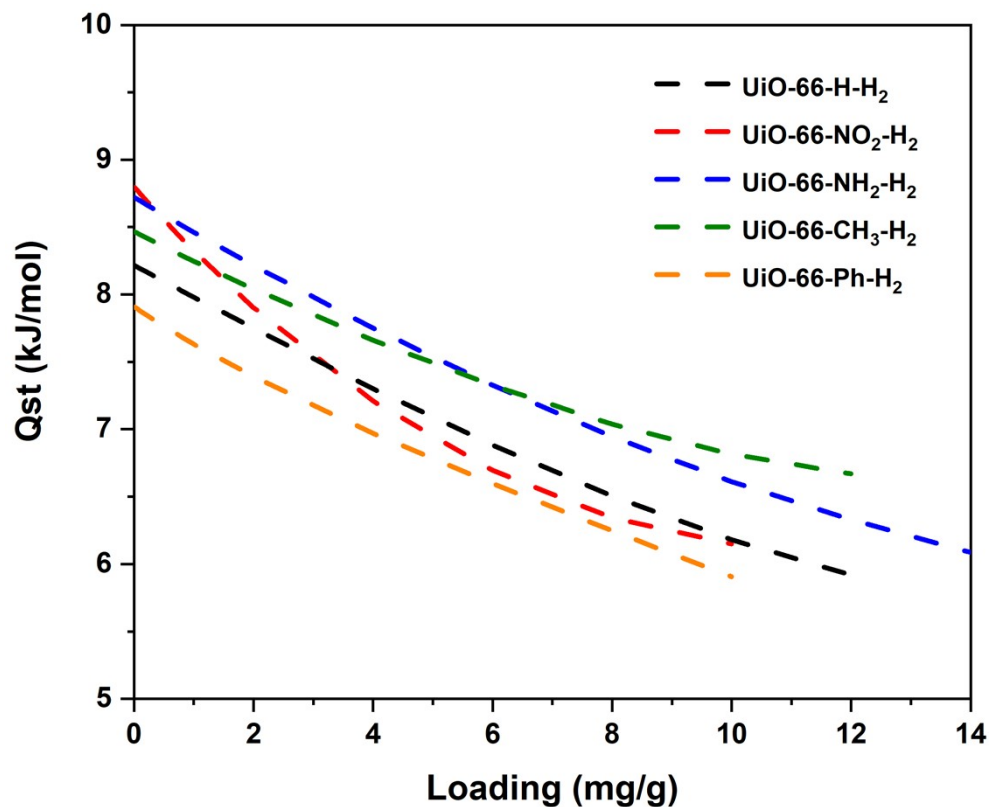

Fig. S4  $Q_{st}$  values of  $H_2$  for UiO-66 and its derivatives.

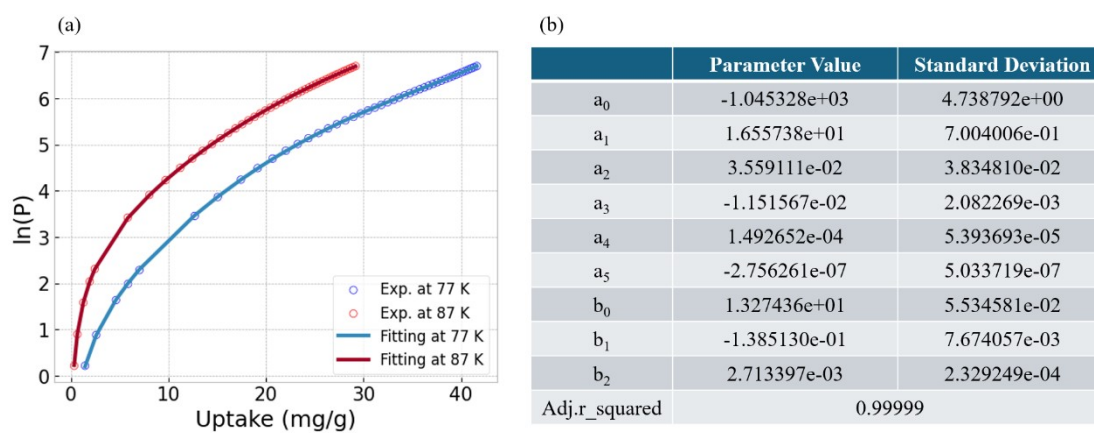

Fig. S5 (a) Virial equation fitting of  $D_2$  adsorption isotherm of UiO-66 at 77 K and 87 K. (b) Relevant fitting parameters for  $D_2$ .

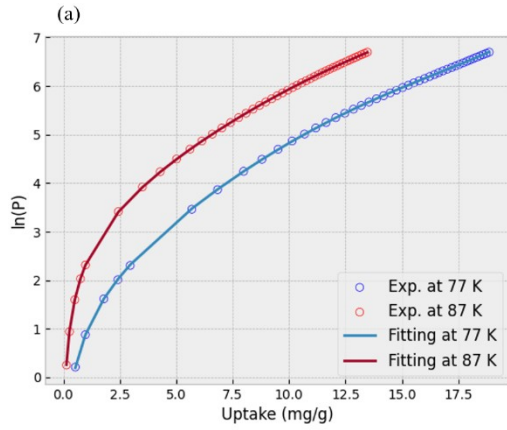

(b)

|               | Parameter Value | Standard Deviation |
|---------------|-----------------|--------------------|
| $a_0$         | -9.882550e+02   | 4.077128e+00       |
| $a_1$         | 2.871482e+01    | 1.335435e+00       |
| $a_2$         | -2.905582e-01   | 1.655464e-01       |
| $a_3$         | 9.709325e-03    | 2.031113e-02       |
| $a_4$         | 2.031113e-02    | 2.031113e-02       |
| $a_5$         | 1.062401e-04    | 2.396133e-05       |
| $b_0$         | 1.357887e+01    | 4.788616e-02       |
| $b_1$         | -2.211570e-01   | 1.473933e-02       |
| $b_2$         | 8.074862e-03    | 9.837410e-04       |
| Adj_r_squared | 0.99999         |                    |

**Fig. S6** (a)Virial equation fitting of  $H_2$  adsorption isotherm of UiO-66 at 77 K and 87 K. (b)Relevant fitting parameters for  $H_2$ .

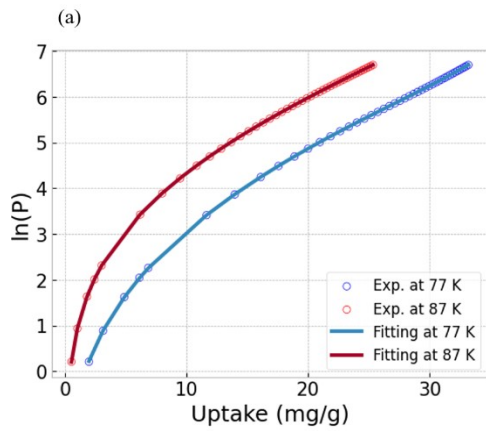

(b)

|               | Parameter Value | Standard Deviation |
|---------------|-----------------|--------------------|
| $a_0$         | -1.072487e+03   | 2.899492e+00       |
| $a_1$         | 2.931302e+01    | 4.891075e-01       |
| $a_2$         | -9.025968e-01   | 3.606648e-02       |
| $a_3$         | 2.146209e-02    | 2.419862e-03       |
| $a_4$         | -5.691658e-04   | 7.609513e-05       |
| $a_5$         | 6.764886e-06    | 8.683065e-07       |
| $b_0$         | 1.308992e+01    | 3.326329e-02       |
| $b_1$         | -1.736808e-01   | 5.074434e-03       |
| $b_2$         | 4.828287e-03    | 1.708937e-04       |
| Adj_r_squared | 0.99999         |                    |

**Fig. S7** (a)Virial equation fitting of  $D_2$  adsorption isotherm of UiO-66- $NO_2$  at 77 K and 87 K. (b)Relevant fitting parameters for  $D_2$ .

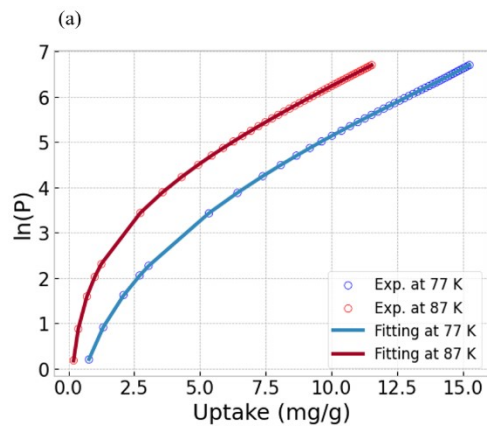

(b)

|               | Parameter Value | Standard Deviation |
|---------------|-----------------|--------------------|
| $a_0$         | -1.058491e+03   | 2.311292e+00       |
| $a_1$         | 6.108177e+01    | 8.593690e-01       |
| $a_2$         | -3.813825e+00   | 1.366653e-01       |
| $a_3$         | 1.587380e-01    | 2.022040e-02       |
| $a_4$         | -9.245952e-03   | 1.394482e-03       |
| $a_5$         | 2.322234e-04    | 3.480840e-05       |
| $b_0$         | 1.392368e+01    | 2.663806e-02       |
| $b_1$         | -4.222818e-01   | 9.034307e-03       |
| $b_2$         | 2.731370e-02    | 6.740710e-04       |
| Adj_r_squared | 0.99999         |                    |

**Fig. S8** (a)Virial equation fitting of  $H_2$  adsorption isotherm of UiO-66- $NO_2$  at 77 K and 87 K. (b)Relevant fitting parameters for  $H_2$ .

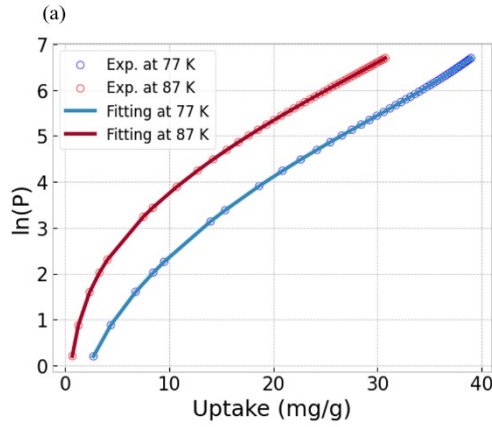

(b)

|               | Parameter Value | Standard Deviation |
|---------------|-----------------|--------------------|
| $a_0$         | -1.112930e+03   | 1.337363e+00       |
| $a_1$         | 2.126991e+01    | 1.843519e-01       |
| $a_2$         | -3.236897e-01   | 1.150401e-02       |
| $a_3$         | 2.501602e-04    | 6.371660e-04       |
| $a_4$         | -6.961676e-05   | 1.691516e-05       |
| $a_5$         | 1.679845e-06    | 1.633872e-07       |
| $b_0$         | 1.331245e+01    | 1.529448e-02       |
| $b_1$         | -1.502539e-01   | 1.877826e-03       |
| $b_2$         | 3.672020e-03    | 5.071206e-05       |
| Adj.r_squared | 0.99999         |                    |

**Fig. S9** (a)Virial equation fitting of  $D_2$  adsorption isotherm of  $UiO-66-NH_2$  at 77 K and 87 K. (b)Relevant fitting parameters for  $D_2$ .

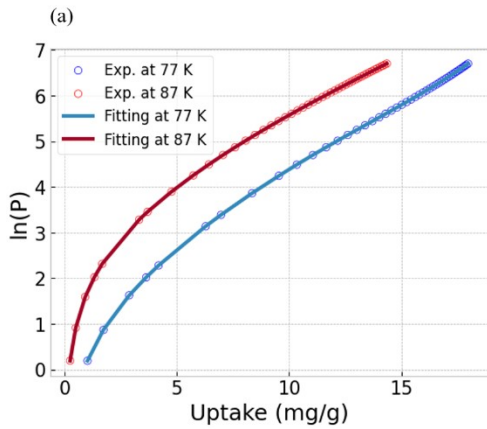

(b)

|               | Parameter Value | Standard Deviation |
|---------------|-----------------|--------------------|
| $a_0$         | -1.049039e+03   | 1.324519e+00       |
| $a_1$         | 3.202629e+01    | 4.002394e-01       |
| $a_2$         | -8.464218e-01   | 5.571483e-02       |
| $a_3$         | 5.337618e-02    | 6.803857e-03       |
| $a_4$         | -5.047177e-03   | 3.940572e-04       |
| $a_5$         | 1.523343e-04    | 8.289304e-06       |
| $b_0$         | 1.356089e+01    | 1.524077e-02       |
| $b_1$         | -1.938236e-01   | 4.102071e-03       |
| $b_2$         | 7.854957e-03    | 2.415677e-04       |
| Adj.r_squared | 0.99999         |                    |

**Fig. S10** (a)Virial equation fitting of  $H_2$  adsorption isotherm of  $UiO-66-NH_2$  at 77 K and 87 K. (b)Relevant fitting parameters for  $H_2$ .

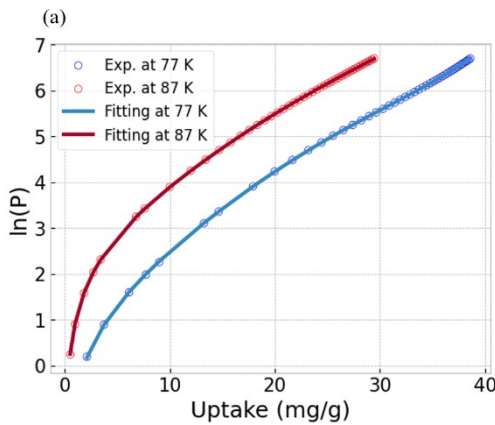

(b)

|               | Parameter Value | Standard Deviation |
|---------------|-----------------|--------------------|
| $a_0$         | -1.080383e+03   | 4.822041e+00       |
| $a_1$         | 1.502653e+01    | 6.878681e-01       |
| $a_2$         | -1.453398e-01   | 4.265834e-02       |
| $a_3$         | 3.838016e-03    | 2.470783e-03       |
| $a_4$         | -3.165429e-04   | 6.713646e-05       |
| $a_5$         | 4.806604e-06    | 6.608159e-07       |
| $b_0$         | 1.327599e+01    | 5.565469e-02       |
| $b_1$         | -1.139251e-01   | 7.269950e-03       |
| $b_2$         | 2.943440e-03    | 2.088492e-04       |
| Adj.r_squared | 0.99999         |                    |

**Fig. S11** (a)Virial equation fitting of  $D_2$  adsorption isotherm of  $UiO-66-CH_3$  at 77 K and 87 K. (b)Relevant fitting parameters for  $D_2$ .

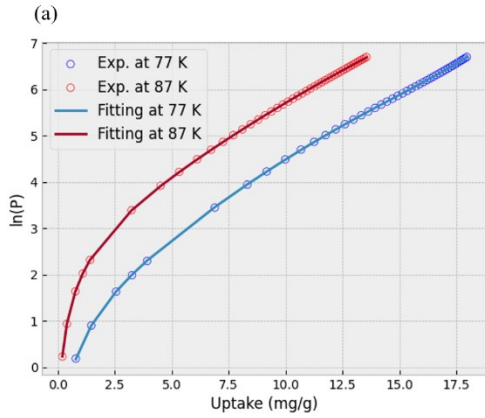

(b)

|               | Parameter Value | Standard Deviation |
|---------------|-----------------|--------------------|
| $a_0$         | -1.018731e+03   | 4.301624e+00       |
| $a_1$         | 2.793145e+01    | 1.357853e+00       |
| $a_2$         | -1.080983e+00   | 1.846144e-01       |
| $a_3$         | 9.214833e-02    | 2.392399e-02       |
| $a_4$         | -8.645377e-03   | 1.403259e-03       |
| $a_5$         | 2.296954e-04    | 2.970438e-05       |
| $b_0$         | 1.350677e+01    | 4.979038e-02       |
| $b_1$         | -2.064536e-01   | 1.458054e-02       |
| $b_2$         | 1.372811e-02    | 9.345533e-04       |
| Adj.r_squared | 0.99999         |                    |

**Fig. S12** (a)Virial equation fitting of  $H_2$  adsorption isotherm of UiO-66-CH<sub>3</sub> at 77 K and 87 K. (b)Relevant fitting parameters for  $H_2$ .

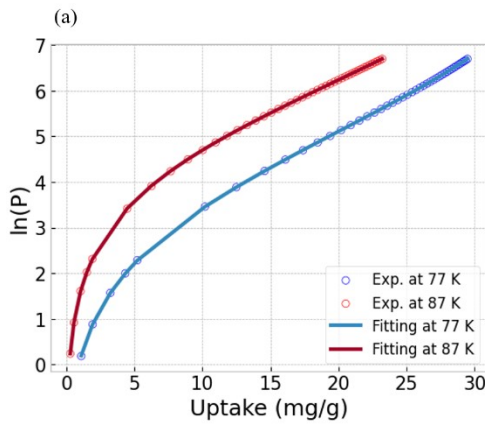

(b)

|               | Parameter Value | Standard Deviation |
|---------------|-----------------|--------------------|
| $a_0$         | -9.989121e+02   | 2.118335e+00       |
| $a_1$         | 1.963457e+01    | 4.154023e-01       |
| $a_2$         | -7.991885e-01   | 3.576619e-02       |
| $a_3$         | 3.740059e-02    | 2.783547e-03       |
| $a_4$         | -1.073828e-03   | 9.968730e-05       |
| $a_5$         | 1.334382e-05    | 1.288904e-06       |
| $b_0$         | 1.290071e+01    | 2.462580e-02       |
| $b_1$         | -8.819437e-02   | 4.374929e-03       |
| $b_2$         | 1.981143e-03    | 1.666985e-04       |
| Adj.r_squared | 0.99999         |                    |

**Fig. S13** (a)Virial equation fitting of  $D_2$  adsorption isotherm of UiO-66-Ph at 77 K and 87 K. (b)Relevant fitting parameters for  $D_2$ .

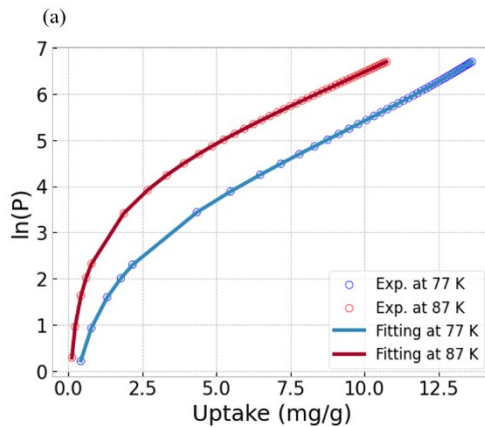

(b)

|               | Parameter Value | Standard Deviation |
|---------------|-----------------|--------------------|
| $a_0$         | -9.513211e+02   | 2.053505e+00       |
| $a_1$         | 3.587937e+01    | 8.833295e-01       |
| $a_2$         | -2.822027e+00   | 1.658553e-01       |
| $a_3$         | 2.914122e-01    | 2.810670e-02       |
| $a_4$         | -1.727734e-02   | 2.187808e-03       |
| $a_5$         | 4.577688e-04    | 6.142418e-05       |
| $b_0$         | 1.331484e+01    | 2.400129e-02       |
| $b_1$         | -1.538242e-01   | 9.370036e-03       |
| $b_2$         | 5.643399e-03    | 7.800525e-04       |
| Adj.r_squared | 0.99999         |                    |

**Fig. S14** (a)Virial equation fitting of  $H_2$  adsorption isotherm of UiO-66-Ph at 77 K and 87 K. (b)Relevant fitting parameters for  $H_2$ .



**Table S2** Summary of experimentally measured hydrogen isotope separation performance on various porous materials

| Compound                                       | T <sub>exp</sub><br>(K) | P <sub>exp</sub><br>(kPa) | selectivity | Q <sub>st</sub> -H <sub>2</sub><br>(kJ/mol) | Q <sub>st</sub> -D <sub>2</sub><br>(kJ/mol) | Measurement<br>methods | Ref.      |
|------------------------------------------------|-------------------------|---------------------------|-------------|---------------------------------------------|---------------------------------------------|------------------------|-----------|
| <b>UiO-66-H</b>                                | 77                      | 100                       | 1.31        | 8.21                                        | 8.69                                        | Breakthrough           | This work |
| <b>UiO-66-NO<sub>2</sub></b>                   |                         |                           | 1.35        | 8.80                                        | 8.91                                        |                        |           |
| <b>UiO-66-NH<sub>2</sub></b>                   |                         |                           | 1.38        | 8.72                                        | 9.25                                        |                        |           |
| <b>UiO-66-CH<sub>3</sub></b>                   |                         |                           | 1.32        | 8.46                                        | 8.98                                        |                        |           |
| <b>UiO-66-Ph</b>                               |                         |                           | 1.34        | 7.91                                        | 8.30                                        |                        |           |
| <b>MOF-74-ac</b>                               | 25                      | 1                         | 7           |                                             |                                             | TDS                    | 1         |
|                                                | 40                      |                           | 12          |                                             |                                             |                        |           |
|                                                | 60                      |                           | 16          |                                             |                                             |                        |           |
|                                                | 77                      |                           | 9           |                                             |                                             |                        |           |
| <b>MOF-74-IM-10</b>                            | 25                      |                           | 6           |                                             |                                             |                        |           |
|                                                | 40                      |                           | 9           |                                             |                                             |                        |           |
|                                                | 60                      |                           | 20          |                                             |                                             |                        |           |
|                                                | 77                      |                           | 26          |                                             |                                             |                        |           |
| <b>FMOF-Cu</b>                                 | 25                      | 1                         | 14          |                                             |                                             | TDS                    | 2         |
| <b>MFU-4l</b>                                  | 50                      | 1                         | 1.7         |                                             |                                             | TDS                    | 3         |
| <b>Cu(I)-MFU-4l</b>                            | 100                     | 1                         | 11          | 32.7                                        | 35.0                                        | TDS                    | 4         |
| <b>CPO-27-Co</b>                               | 60                      | 3                         | 12          | 12.5                                        | 14.5                                        | TDS                    | 5         |
| <b>Ni<sub>2</sub>Cl<sub>2</sub>BBTA</b>        | 77                      | 1                         | 4.5         | 6.0                                         | 6.7                                         | TDS                    | 6         |
| <b>MOF-303</b>                                 | 25                      | 100                       | 21.6        |                                             |                                             | TDS                    | 7         |
| <b>Cu(I)Cu(II)-BTC</b>                         | 30                      | 1                         | 37.9        | 2.28                                        | 5.13                                        | TDS                    | 8         |
| <b>Ni<sub>2</sub>(dobdc)</b>                   | 77                      | 100                       | 4.5         | 11.8                                        | 13.8                                        | Breakthrough           | 9         |
| <b>Ni<sub>2</sub>(dobpdc)</b>                  |                         |                           | 4.8         | 11                                          | 12.9                                        |                        |           |
| <b>Ni<sub>2</sub>(olz)</b>                     |                         |                           | 5.6         | 11.8                                        | 12.9                                        |                        |           |
| <b>Ni<sub>2</sub>(dotpdc)</b>                  |                         |                           | 4.6         | 11.1                                        | 12.6                                        |                        |           |
| <b>UTSC-700</b>                                | 30                      | 1                         | 7.3         | 3.5                                         | 4                                           | TDS                    | 10        |
| <b>FJI-Y9</b>                                  | 77                      | 100                       | 1.3         | 6.0                                         | 6.2                                         |                        | 11        |
| <b>FIR-29</b>                                  |                         |                           | 1.2         | 5.8                                         | 6.1                                         |                        |           |
| <b>FJI-Y11</b>                                 | 77                      | 100                       | 1.76        | 7.13                                        | 7.88                                        | Breakthrough           | 12        |
| <b>Co(py<sub>2</sub>z)[Pd(CN)<sub>4</sub>]</b> | 25                      | 1                         | 21.7        | 7.28                                        | 7.76                                        | TDS                    | 13        |
| <b>Cu-BDC-NH<sub>2</sub></b>                   | 77                      | 100                       | 1.6         | 7.03                                        | 7.14                                        |                        | 14        |

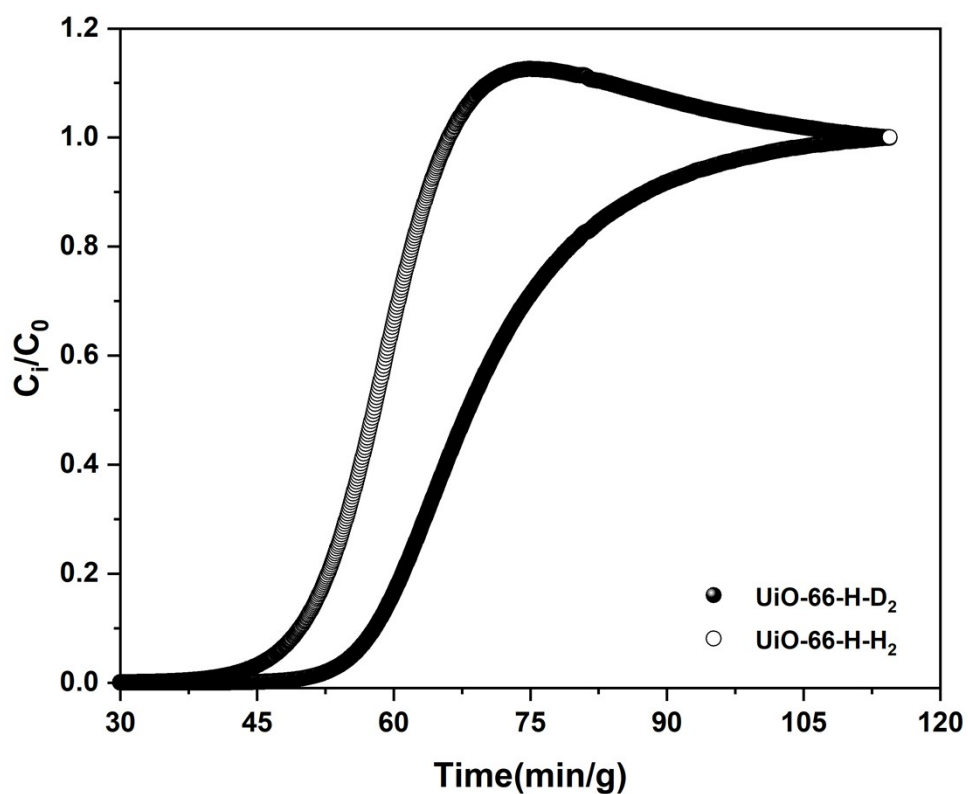

Fig. S15 Experimental breakthrough curves of UiO-66 for the mixed gases of D<sub>2</sub>/H<sub>2</sub>/Ne (3/3/94, v/v) at 77 K and 1 bar.

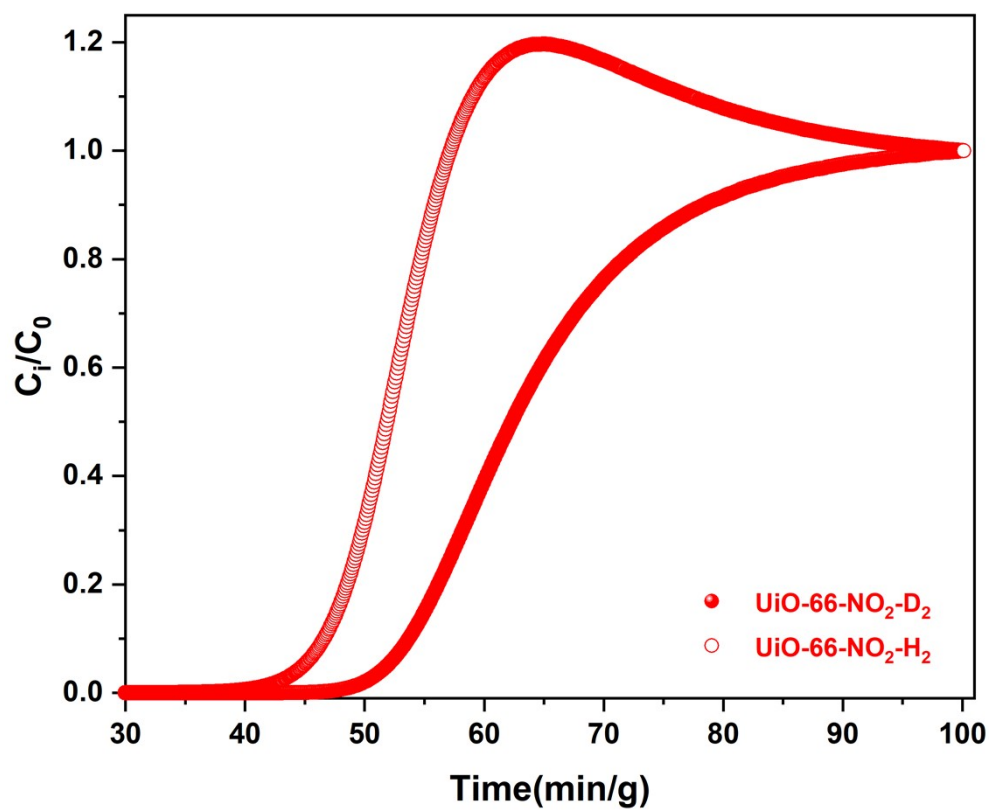

Fig. S16 Experimental breakthrough curves of UiO-66-NO<sub>2</sub> for the mixed gases of D<sub>2</sub>/H<sub>2</sub>/Ne (3/3/94, v/v) at 77 K and 1 bar.

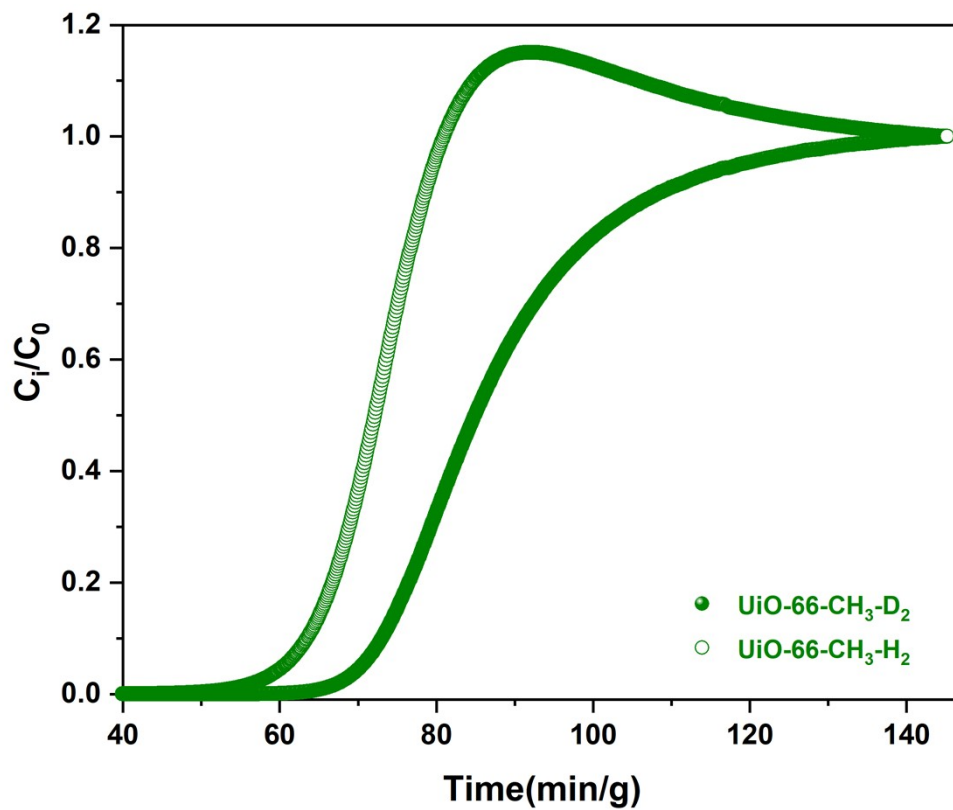

Fig. S17 Experimental breakthrough curves of **UiO-66-CH<sub>3</sub>** for the mixed gases of D<sub>2</sub>/H<sub>2</sub>/Ne (3/3/94, v/v) at 77 K and 1 bar.

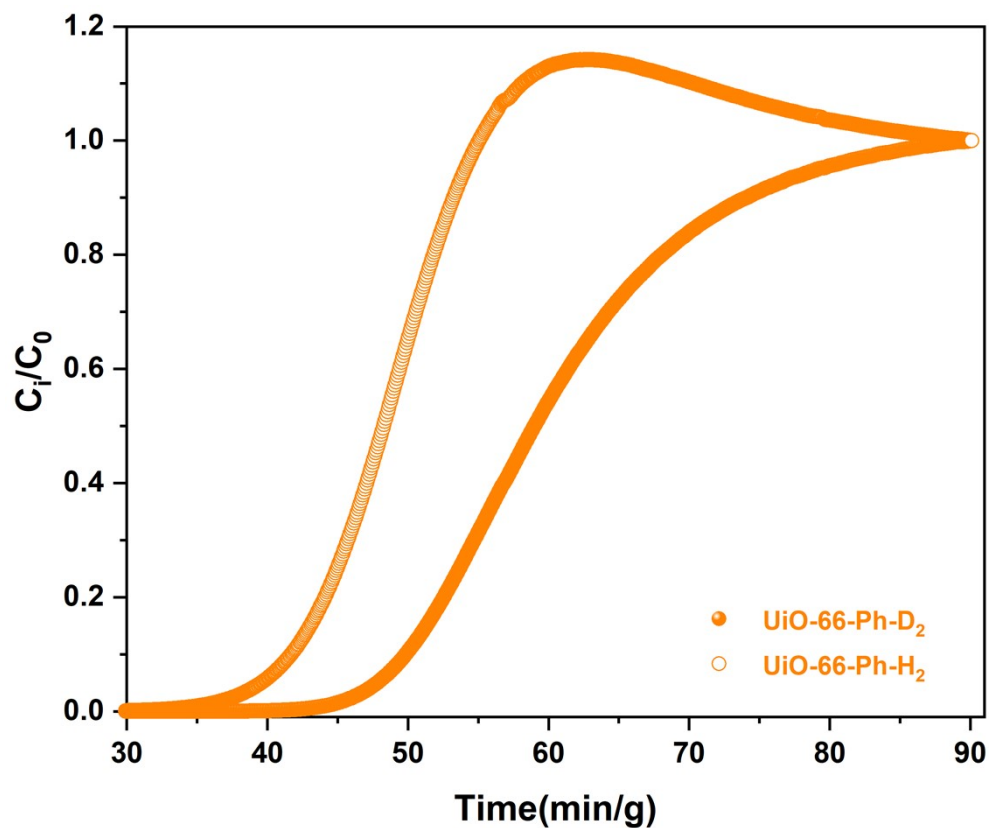

Fig. S18 Experimental breakthrough curves of **UiO-66-Ph** for the mixed gases of D<sub>2</sub>/H<sub>2</sub>/Ne (3/3/94, v/v) at 77 K and 1 bar.

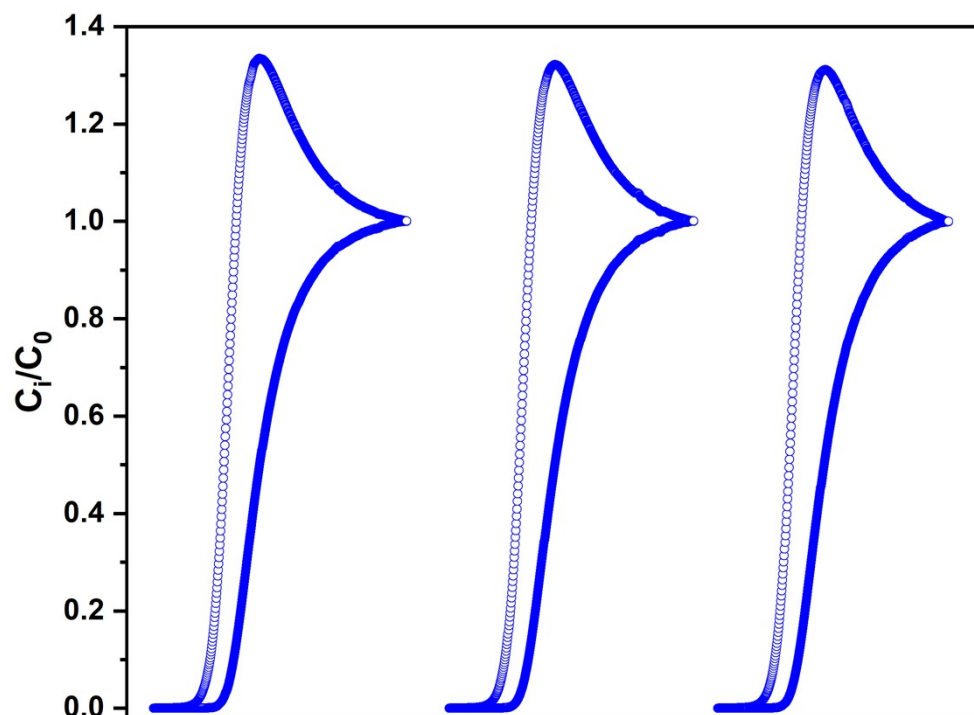

**Fig. S19** Three consecutive breakthrough cycles of **UiO-66-NH<sub>2</sub>** at 77 K.

## References

1. J. Y. Kim, R. Balderas-Xicohtencatl, L. Zhang, S. G. Kang, M. Hirscher, H. Oh and H. R. Moon, Exploiting Diffusion Barrier and Chemical Affinity of Metal-Organic Frameworks for Efficient Hydrogen Isotope Separation, *J. Am. Chem. Soc.*, 2017, **139**, 15135-15141.
2. L. Zhang, S. Jee, J. Park, M. Jung, D. Wallacher, A. Franz, W. Lee, M. Yoon, K. Choi, M. Hirscher and H. Oh, Exploiting Dynamic Opening of Apertures in a Partially Fluorinated MOF for Enhancing H<sub>2</sub> Desorption Temperature and Isotope Separation, *J. Am. Chem. Soc.*, 2019, **141**, 19850-19858.
3. I. Savchenko, A. Mavrandonakis, T. Heine, H. Oh, J. Teufel and M. Hirscher, Hydrogen isotope separation in metal-organic frameworks: Kinetic or chemical affinity quantum-sieving?, *Micropor. Mesopor. Mat.*, 2015, **216**, 133-137.
4. I. Weinrauch, I. Savchenko, D. Denysenko, S. M. Souliou, H. H. Kim, M. Le Tacon, L. L. Daemen, Y. Cheng, A. Mavrandonakis, A. J. Ramirez-Cuesta, D. Volkmer, G. Schutz, M. Hirscher and T. Heine, Capture of heavy hydrogen isotopes in a metal-organic framework with active Cu(I) sites, *Nat. Commun.*, 2017, **8**, 14496.
5. H. Oh, I. Savchenko, A. Mavrandonakis, T. Heine and M. Hirscher, Highly Effective Hydrogen Isotope Separation in Nanoporous Metal–Organic Frameworks with Open Metal Sites: Direct Measurement and Theoretical Analysis, *ACS Nano*, 2014, **8**, 761-770.
6. X. Li, X. Wang, M. Li, J. Luo, Y. An, P. Li, J. Song, C. Chen, X. Feng and S. Wang, Highly selective adsorption of D<sub>2</sub> from hydrogen isotopes mixture in a robust metal bistriazolate framework with open metal sites, *Int. J. Hydrogen Energy*, 2020, **45**, 21547-21554.
7. H. Kim, S. Jee, J. Park, M. Jung, R. Muhammad, K. Choi and H. Oh, High D<sub>2</sub>/H<sub>2</sub> selectivity performance in MOF-303 under ambient pressure for potential industrial applications, *Sep.*

*Purif. Technol.*, 2023, **325**, 124660.

8. X. Hu, F. Ding, R. Xiong, Y. An, X. Feng, J. Song, L. Zhou, P. Li and C. Chen, Highly Effective H<sub>2</sub>/D<sub>2</sub> Separation within the Stable Cu(I)Cu(II)-BTC: The Effect of Cu(I) Structure on Quantum Sieving, *ACS Appl. Mater. Interfaces*, 2023, **15**, 3941-3952.
9. L. Li, C. Ji, W. Wang, F. Wu, Y.-X. Tan and D. Yuan, The effect of pore sizes on D<sub>2</sub>/H<sub>2</sub> separation conducted by MOF-74 analogues, *Inorg. Chem. Front.*, 2022, **9**, 1674-1680.
10. Q. Yan, J. Wang, L. Zhang, J. Liu, M. Wahiduzzaman, N. Yan, L. Yu, R. Dupuis, H. Wang, G. Maurin, M. Hirscher, P. Guo, S. Wang and J. Du, A squarate-pillared titanium oxide quantum sieve towards practical hydrogen isotope separation, *Nat. Commun.*, 2023, **14**, 4189.
11. F. J. Zhao, Y. X. Tan, W. Wang, Z. Ju and D. Yuan, Optimizing H<sub>2</sub>, D<sub>2</sub>, and C<sub>2</sub>H<sub>2</sub> Sorption Properties by Tuning the Pore Apertures in Metal-Organic Frameworks, *Inorg. Chem.*, 2018, **57**, 13312-13317.
12. Y. Si, X. He, J. Jiang, Z. Duan, W. Wang and D. Yuan, Highly effective H<sub>2</sub>/D<sub>2</sub> separation in a stable Cu-based metal-organic framework, *Nano Res.*, 2019, **14**, 518-525.
13. J. Ha, M. Jung, J. Park, H. Oh and H. R. Moon, Thermodynamic Separation of Hydrogen Isotopes Using Hofmann-Type Metal-Organic Frameworks with High-Density Open Metal Sites, *ACS Appl. Mater. Interfaces*, 2022, **14**, 30946-30951.
14. A. Dastbaz, J. Karimi-Sabet, Y. Amini and M. A. Moosavian, A comprehensive study on the kinetics and isotherms of D<sub>2</sub>/H<sub>2</sub> adsorptive separation using pure and composite Cu-BDC-NH<sub>2</sub> MOFs at 77 K, *Int. J. Hydrogen Energy*, 2024, **61**, 893-900.
